1 **Full Title: Causal associations between potentially modifiable risk factors and the**  
2 **Alzheimer's phenome: A Mendelian randomization study**

3 **Short Title: Causal effect of modifiable risk factors on the Alzheimer's phenome**

4

5 Shea J Andrews<sup>a\*</sup>, Edoardo Marcora<sup>a</sup>, Alison Goate<sup>a</sup>

6

7 <sup>a</sup> Ronald M. Loeb Center for Alzheimer's disease, Department of Neuroscience, Icahn School of  
8 Medicine at Mount Sinai, New York, NY, USA

9

10 \*Correspondence to: Shea Andrews, The Icahn School of Medicine at Mount Sinai, 1 Gustave  
11 L. Levy Place, New York, NY 10029.

12 Tel: +1-212-659-8632; E-mail: shea.andrews@mssm.edu

13 **Abstract**

14 **Background:** Potentially modifiable risk factors have been associated with Alzheimer's disease  
15 (AD). However, the causality of these risk factors on AD is unclear. Using Mendelian  
16 randomization we evaluated the causal effect of potentially modifiable risk factors on AD and its  
17 associated endophenotypes to inform the development of lifestyle interventions that could  
18 reduce risk of developing AD.

19 **Methods and Findings:** Genetic instruments for the exposures were selected from genome  
20 wide association studies (GWAS) for traits previously linked to AD in observational studies  
21 including alcohol intake, physical activity, lipid traits, blood pressure traits, type 2 diabetes,  
22 body-mass index (BMI), depression, sleep, social isolation, smoking, oily fish intake, and  
23 educational attainment. The outcomes included AD status, AD age of onset survival (AAOS),  
24 hippocampal volume, CSF levels of  $A\beta_{42}$ , tau, and ptau<sub>181</sub>, and neuropathological burden of  
25 neuritic plaques, neurofibrillary tangles, and vascular brain injury (VBI). MR estimates were  
26 calculated using an inverse variance weighted approach. Genetically predicted educational  
27 attainment (OR [CI]: 0.7 [0.63, 0.78]), diastolic blood pressure (DBP) (OR [CI]: 0.99 [0.98,  
28 0.99]), systolic blood pressure (SBP) (OR [CI]: 0.99 [0.99, 1]) and physical activity (OR [CI]: 2.5  
29 [1.47, 4.23]) were causally associated with AD risk. Genetically predicted BMI (HR [CI]: 1.13  
30 [1.07, 1.2]) and educational attainment (HR [CI]: 0.74 [0.68, 0.82]) were causally associated with  
31 AAOS. Genetically predicted alcohol consumption ( $\beta$  [CI]: -0.15 [-0.25, -0.05]), broad depressive  
32 symptoms ( $\beta$  [CI]: 0.5 [0.2, 0.8]), major depressive disorder ( $\beta$  [CI]: 0.12 [0.05, 0.18]) and  
33 physical activity were causally associated with CSF  $A\beta_{42}$  ( $\beta$  [CI]: 0.25 [0.1, 0.39]). Genetically  
34 predicted DBP was causally associated with CSF total Tau ( $\beta$  [CI]: -0.005 [-0.007, -0.002]).  
35 Increased risk of VBI were observed for genetically predicted DBP (OR [CI]: 1.05 [1.02, 1.08]),  
36 SBP (OR [CI]: 1.06 [1.03, 1.1]), and pulse pressure (OR [CI]: 1.03 [1.01, 1.05]). Increased risk of  
37 neuritic plaque burden were observed for genetically predicted LDL-cholesterol (OR [CI]: 1.87

38 [1.3, 2.69]) and total cholesterol (OR [CI]: 2.03 [1.44, 2.85]). Genetically predicted insomnia  
39 symptoms ( $\beta$  [CI]: -0.2 [-0.34, -0.06]) and total cholesterol were associated ( $\beta$  [CI]: -0.06 [-0.1, -  
40 0.03]) with hippocampal volume. Potential limitations include weak instrument bias, non-  
41 homogenous samples and other implicit limitations of MR analysis.

42 **Conclusions:** Demonstration of a causal relationship between blood pressure, cholesterol  
43 levels, BMI, depression, insomnia symptoms, physical activity and educational attainment on  
44 the AD phenome strongly support public health programs to educate the public about these  
45 preventable causes of AD.

46

47 **Keywords:** Alzheimer's disease; endophenotypes; Mendelian randomization; risk factors

48

49

## 50 **Introduction**

51 Late-onset Alzheimer's disease (AD) is a debilitating neurological condition characterized by  
52 progressive deterioration in cognitive function and concomitant functional decline [1]. The  
53 primary neuropathological hallmarks of AD are the aggregation of extracellular amyloid- $\beta$  ( $A\beta$ )  
54 peptides into amyloid plaques and of intracellular hyperphosphorylated tau into neurofibrillary  
55 tau tangles (NFTs), accompanied by gliosis and neurodegeneration [1,2].

56

57 In the absence of any pharmacotherapeutic intervention, the number of people living with  
58 dementia – of which AD accounts for ~70% of cases – is expected to exceed 130 million by  
59 2050 [3]. Observational studies have identified potentially modifiable risk factors that could be  
60 targeted in intervention studies to reduce the risk of dementia [4]. From these studies it has  
61 been estimated that 35% of AD cases may be attributable to preventable causes such as low  
62 educational attainment, hearing loss, hypertension, obesity, smoking depression physical  
63 inactivity, social isolation and diabetes [5]. This suggests that interventions that target modifiable  
64 risk factors could significantly reduce the population prevalence of AD and related dementias.

65

66 Lifestyle interventions that target modifiable risk factors are entirely dependent on accurate  
67 causal relationships being established between modifiable risk factors and AD. In observational  
68 studies, a correlation between a risk factor and AD cannot be reliably interpreted as evidence of  
69 a causal relationship. First, this can be due to confounding, where some or all of the correlation  
70 can be due to a third confounding variable that is correlated to both the putative risk factor and  
71 AD. Second, the observed correlation between a risk factor and dementia may be due to  
72 reverse causation, where the neurodegenerative and cerebrovascular changes that underlie  
73 dementia begin decades before the onset of clinical symptoms. As such, the lifestyle risk factors  
74 that are associated with the development of dementia in late-life may themselves be a

75 consequence of the same underlying pathological processes and not a causal factor of  
76 dementia. If this is the case, disease reduction strategies targeting modifiable risk factors are  
77 unlikely to be successful.

78

79 A novel method for establishing causal relationships between exposures (e.g. modifiable risk  
80 factors) and outcomes (e.g. AD) is Mendelian randomization (MR). MR uses genetic variants as  
81 proxies for environmental exposures to provide an estimate of the causal association between  
82 an intermediate exposure and a disease outcome [6]. MR is similar to a 'genetic randomized  
83 control trial' due to the random allocation of genotypes from parents to offspring and is thus not  
84 affected by reverse causation and is independent of confounding factors that may influence  
85 disease outcomes [6]. MR analysis can be conducted using GWAS summary statistics, taking  
86 advantage of the increased samples sizes available in independent GWAS and the increasing  
87 number of genetic variants being discovered to increase statistical power [7].

88

89 In this study we used MR to establish causal relationships between modifiable risk factors and  
90 the AD phenome – AD status, AD age of onset survival (AAOS), amyloid-beta<sub>42</sub> (A $\beta$ <sub>42</sub>), tau and  
91 hyperphosphorylated tau (ptau<sub>181</sub>) levels in cerebrospinal fluid (CSF), the neuropathological  
92 burden of neuritic plaques, neurofibrillary tangles and vascular brain injury, and hippocampal  
93 volume. Based on these analyses we identified a subset of modifiable risk factors that represent  
94 the most promising targets for public health initiatives to reduce AD burden in the population.

95

## 96 **Methods**

### 97 **Data Sources**

98 We obtained GWAS summary statistics (GWAS-SS) for each exposure and outcome of interest  
99 (Table 1). For the exposures these included: alcohol consumption [8], alcohol dependence [9],

100 Table 1: Genome-wide association studies used in this study

| Study                   | Trait                     | Cohort / Consortium | N       | Age   | Females (%) |
|-------------------------|---------------------------|---------------------|---------|-------|-------------|
| <b><u>Exposures</u></b> |                           |                     |         |       |             |
| Liu et al 2019          | Alcohol Consumption       | GSCAN               | 537,349 |       |             |
|                         | Smoking Initiation        | GSCAN               | 262,990 |       |             |
|                         | Cigarettes per Day        | GSCAN               | 263,954 |       |             |
| Clarke et al 2017       | Alcohol Use Disorder Test | UKBB                | 121,600 | 56.1  | 52.7        |
| Walters et al 2018      | Alcohol Dependence        | PGC                 | 46,568  | -     | -           |
| NealLab                 | Oily Fish Intake          | UKBB                |         | 56.5* | 54.4*       |
| NealLab                 | Hearing Problems          | UKBB                | 346,635 | 56.5* | 54.4*       |
| Xue et al 2018          | Type 2 Diabetes           | DIAGRAM; UKBB; GERA | 659,316 | -     | -           |
| Yengo et al 2018        | Body Mass Index           | UKBB; GIANT         | 690,495 | -     | -           |
| Willer et al 2013       | Total Cholesterol         | GLC                 | 188,577 | 54.94 | 56.58       |

|                      |                           |                                                     |         |      |      |
|----------------------|---------------------------|-----------------------------------------------------|---------|------|------|
|                      | LDL Cholesterol           |                                                     |         |      |      |
|                      | HDL Cholesterol           |                                                     |         |      |      |
|                      | Triglycerides             |                                                     |         |      |      |
| Evangelou et al 2018 | Diastolic Blood Pressure  | UKBB; ICBP                                          | 757,601 | -    | -    |
|                      | Systolic Blood Pressure   |                                                     |         |      |      |
|                      | Pulse Pressure            |                                                     |         |      |      |
| Howard et al 2018    | Broad Depression Symptoms | UKBB                                                | 322,580 | -    | -    |
| Wray et al 2018      | Major Depression Disorder | PGC; deCODE; iPSYCH;<br>GeneScotland; GERA;<br>UKBB | 480,359 | -    | -    |
| Jansen et al 2018    | Insomnia Symptoms         | UKBB                                                | 386,533 | 56.7 | 54   |
| Dashti et al 2019    | Sleep Duration            | UKBB                                                | 446,118 | 57.3 | 54.1 |
| Day et al 2018       | Social Isolation          | UKBB                                                | 452,302 | -    | -    |
| Lee et al 2018       | Educational Attainment    | UKBB; SSGAC                                         | 766,345 | 63.8 | 54.7 |



## Outcomes

|                    |                                   |                |        |      |       |
|--------------------|-----------------------------------|----------------|--------|------|-------|
| Lambert et al 2013 | Late Onset Alzheimer's disease    | IGAP           | 54,162 | 71   | 58.4  |
| Kunkle et al 2019  | Late Onset Alzheimer's disease    | IGAP           | 63,926 | 72.6 | 58.5  |
| Huang et al 2017   | Alzheimer's Age of Onset Survival | IGAP           | 40,255 | 77.5 | 60.35 |
| Deming et al 2017  | CSF Ab <sub>42</sub>              | Knight-ADRC    | 3,146  | 71.8 | 49.57 |
|                    | CSF Ptau <sub>181</sub>           |                |        |      |       |
|                    | CSF Tau                           |                |        |      |       |
| Hibar et al 2015   | Hippocampal Volume                | ENIGMA         | 13,688 | 39.9 | 51.8  |
| Hibar et al 2017   | Hippocampal Volume                | ENIGMA; CHARGE | 26,814 | 54.3 | 55.3  |
| Beecham et al 2014 | Neuritic Plaques                  | ADGC           | 4,914  | 74.7 | 65.4  |
|                    | Neurofibrillary tangles           |                |        |      |       |
|                    | Vascular Brain Injury             |                |        |      |       |

102 the alcohol use disorder identification test (AUDIT) [10], moderate-vigorous physical activity  
103 (MVPA) [11], lipid traits [12], systolic blood pressure (SBP), diastolic blood pressure (DBP),  
104 pulse pressure (PP) [13], type 2 diabetes (T2D) [14], body mass index (BMI) [15], broad  
105 depression symptoms [16], major depression disorder (MDD) [17], Insomnia symptoms [18],  
106 sleep duration [19], social isolation [20], smoking initiation [8], cigarettes per day [8], and  
107 educational attainment [21]. We used unpublished summary statistics generated from the UK  
108 Biobank for oily fish intake, and hearing problems (<http://www.nealelab.is/uk-biobank/>), which  
109 have been implicated as risk factors for AD.

110  
111 GWAS-SS for the AD phenome consisted of late-onset AD status [22], AAOS [23], CSF levels  
112 of  $A\beta_{42}$ , ptau<sub>181</sub> and total tau (Tau) [24], neuropathological burden of neuritic plaques,  
113 neurofibrillary tangle burden, and vascular brain injury [25], and hippocampal volume [26]. Due  
114 to data use restrictions, earlier GWAS for AD [27] and hippocampal volume [28] were used for  
115 estimating the causal effect of alcohol intake and educational attainment on these phenotypes.

116  
117 GWAS-SS that were mapped to earlier human genome builds were lifted over to Human  
118 Genome Build 19 [29]. GWAS-SS were standardized using a pipeline  
119 ([https://github.com/marcoralab/sumstats\\_munger](https://github.com/marcoralab/sumstats_munger)), that 1) aligns effect alleles to the alternate  
120 allele on the forward strand of the human genome reference build and normalizes indels, 2)  
121 annotates variants with marker names using chromosome:position:ref:alt, 1000 Genomes rsIDs  
122 (phase 3), and dbSNP rsIDs (b151) 3) where allele frequencies are missing, annotates allele  
123 frequencies using non-Finnish Europeans from gnomAD (v2.1), and 4) converts summary  
124 statistics to VCF and TSV files.

125

126 **Genetic Instruments**

127 For each exposure, we constructed two instrumental variables (IV) using genome-wide  
128 significant ( $p < 5 \times 10^{-8}$ ) and nominally significant ( $p < 5 \times 10^{-6}$ ) loci. Increasing the number of  
129 loci in the instrumental variable increases the variance explained by the IV and improves power.  
130 However, this can increase the likelihood of bias due to variants violating the core MR  
131 assumptions and bias results towards the null by increasing weak instrument bias. To obtain  
132 independent SNPs, linkage disequilibrium (LD) clumping was performed by excluding SNPs that  
133 had an  $r^2 > 0.001$  with another variant with a smaller p-value association within a 1000kb  
134 window using PLINK [30]. For genetic variants that were not present in the outcome GWAS,  
135 PLINK was used to identify proxy SNPs that were in LD ( $r^2 > 0.8$ ; EUR reference population).  
136 Finally, the exposure and outcome GWAS datasets were harmonized so that the effect size for  
137 the exposure and outcome correspond to the same effect alleles. Genetic variants that were  
138 palindromic with ambiguous allele frequencies ( $AF > 0.42$ ) or incompatible alleles were  
139 removed. The proportion of variance in the phenotype explained by each instrument and F-  
140 statistic were calculated as previously described [31,32].

141

## 142 **Mendelian Randomization Analysis**

143 For each genetic variant, we calculated an instrumental variable ratio estimate by dividing the  
144 SNP-exposure by SNP-outcome and coefficients were combined in a fixed-effects meta-  
145 analysis using an inverse-variance weighted (IVW) approach to give an overall estimate of  
146 causal effect [7]. The IVW method assumes that all SNPs included in the causal estimate are  
147 valid instruments - that is they do not violate any of the underlying assumptions [7]. In order to  
148 account for potential violations of the assumptions underlying the IVW analysis, we conducted  
149 sensitivity analysis using alternative MR methods known to be more robust to horizontal  
150 pleiotropy, but at the cost of reduced statistical power. The alternative approaches included 1)  
151 Weighted Median Estimator (WME), which takes the median effect of all available variants,

152 allowing 50% of variants to exhibit horizontal pleiotropy [33]; 2) Weighted Mode Based  
153 Estimator (WMBE), which clusters variants into groups based on similarity of causal effects and  
154 reports the final causal effect based on the cluster with the largest number of variants [34]; and  
155 3) MR-Egger regression, which allows all variants to be subject to direct effects [35].

156

157 The MR-Egger regression intercept was used to verify the absence of pleiotropic effects of the  
158 SNPs on the outcome [35]. To further confirm the absence of distortions in the causal effects  
159 due to heterogeneity or pleiotropy, we used the Mendelian randomization pleiotropy residual  
160 sum and outlier (MR-PRESSO) test to detect and correct for horizontal pleiotropic outliers [36].  
161 Where heterogeneity was detected (the MR-PRESSO Global Test) and significant outliers were  
162 detected (MR-PRESSO Outlier Test), the outliers were removed.

163

164 We report the IVW results for the p-value threshold model with the smallest p-value and where  
165 outliers were removed if detected. Where there was evidence of horizontal pleiotropy (MR-  
166 PRESSO Global Test  $p < 0.05$  or an MR-Egger Intercept  $p < 0.05$ ) we report the IVW results  
167 where the sensitivity analyses were also significant and the effect direction was concordant with  
168 the IVW results. To account for multiple testing burden, we report q-values, a false discovery  
169 rate-based measure of significance [37]. Power analyses were conducted using the non-  
170 centrality parameter based approach using the observed IVW coefficient [38].

171

172 All statistical analyses were conducted using R version 3.5.2 [39]. Mendelian randomization  
173 analysis was performed using the 'TwoSampleMR' package [40]. A Snakemake workflow was  
174 constructed that automates the MR analysis pipeline and allows for multiple exposure –  
175 outcomes datasets to be run in parallel [41].

176

177 The SNPs used in each instrument, their harmonized effects and, outliers are presented in S1  
178 Table. The causal estimates for each p-value threshold, MR method and pre- and post-outlier  
179 removal are presented in S2 Table. An R Shiny application is available to review the output of  
180 the analysis pipeline ([https://sjfandrews.shinyapps.io/MR\\_ADPhenome/](https://sjfandrews.shinyapps.io/MR_ADPhenome/)). Code is available at  
181 [https://github.com/sjfandrews/MR\\_ADPhenome](https://github.com/sjfandrews/MR_ADPhenome).

182

## 183 **Results**

184 We conducted a total of 405 tests – 9 outcomes, 23 exposures, and 2  $P_t$  (alcohol dependence  
185 was only run with a  $P_t < 5e-6$ ) – and observed 18 tests that were significant at an FDR < 0.05  
186 (Table 2; Figure 1). Of these 18 significant tests, 16 exposure-outcome pairs showed either no  
187 evidence of horizontal pleiotropy, or in the presence of horizontal pleiotropy the additional MR  
188 sensitivity analyses were significant. The PVE, F-statistics and power for each model are  
189 presented in S2 Table.

190

### 191 **Alzheimer's disease**

192 Genetically predicted educational attainment was associated with significantly lower odds of AD  
193 (OR [CI]: 0.7 [0.63, 0.78]). There was evidence of heterogeneity, but not of directional  
194 pleiotropy, however, the associations were consistent in the MR-Egger, WMBE, and WME  
195 sensitivity analyses. Genetically predicted higher DBP and SBP were associated with  
196 significantly lower odds of developing AD after outlier removal (OR [CI]: 0.99 [0.98, 0.99], OR  
197 [CI]: 0.99 [0.99, 1] respectively). For both exposures, there was evidence of heterogeneity, but  
198 not of directional pleiotropy, however, the associations were consistent in the MR-Egger  
199 sensitivity analysis. Genetically predicted increased MVPA was associated with significantly  
200 increased odds of

201 Table 2: Causal association of potentially modifiable risk factors on Alzheimer's disease and Alzheimer's endophenotypes

| Exposure                 | P <sub>t</sub> | SNPs<br>n | Outliers<br>n | IVW                 |          | MR-Egger             | WMBE                | WME                | MR-PRESSO<br>Global | MR-Egger<br>Intercept |
|--------------------------|----------------|-----------|---------------|---------------------|----------|----------------------|---------------------|--------------------|---------------------|-----------------------|
|                          |                |           |               | b (SE)              | q-value  | b (SE)               | b (SE)              | b (SE)             | p                   | p                     |
|                          |                |           |               |                     |          |                      |                     |                    |                     |                       |
| <b><u>LOAD</u></b>       |                |           |               |                     |          |                      |                     |                    |                     |                       |
| Diastolic Blood Pressure | 5e-08          | 705       | 1             | -0.013<br>(0.0038)  | 0.008    | -0.025<br>(0.011)*   | -0.009<br>(0.0062)  | -0.016<br>(0.015)  | <4e-05              | 0.23                  |
| Systolic Blood Pressure  | 5e-08          | 679       | 2             | -0.0081<br>(0.0023) | 0.008    | -0.018<br>(0.0069)** | -0.0035<br>(0.0037) | 0.0054<br>(0.0096) | <4e-05              | 0.11                  |
| Educational Attainment   | 5e-06          | 932       | 0             | -0.36<br>(0.053)    | 4.07E-09 | -0.87<br>(0.22)***   | -0.38<br>(0.085)*** | -0.74<br>(0.3)*    | <2e-05              | 0.017                 |
| Moderate-to-vigorous PA  | 5e-08          | 26        | 7             | 0.91<br>(0.27)      | 0.01     | 1.6<br>(0.85).       | 0.83<br>(0.36)*     | 0.83<br>(0.59)     | 0.982               | 0.38                  |
| <b><u>AAOS</u></b>       |                |           |               |                     |          |                      |                     |                    |                     |                       |
| Diastolic Blood Pressure | 5e-06          | 1180      | 0             | 0.0091<br>(0.0036)  | 0.081    | 0.002<br>(0.0094)    | 0.0069<br>(0.0063)  | 0.00073<br>(0.013) | 0.0023              | 0.41                  |

|                                   |       |      |   |                  |          |                   |                     |                   |          |       |
|-----------------------------------|-------|------|---|------------------|----------|-------------------|---------------------|-------------------|----------|-------|
| Educational Attainment            | 5e-06 | 957  | 0 | -0.3<br>(0.049)  | 1.36E-07 | 0.03<br>(0.19)    | -0.32<br>(0.078)*** | -0.37<br>(0.23)   | 0.0154   | 0.071 |
| BMI                               | 5e-06 | 1462 | 2 | 0.12<br>(0.031)  | 0.002    | -0.023<br>(0.092) | 0.14<br>(0.052)**   | 0.13<br>(0.14)    | 0.0078   | 0.086 |
| Type 2 Diabetes                   | 5e-06 | 282  | 0 | 0.067<br>(0.016) | 0.001    | 0.048<br>(0.042)  | 0.041<br>(0.031)    | 0.061<br>(0.035). | 4.00E-04 | 0.6   |
| <b><u>CSF Ab<sub>42</sub></u></b> |       |      |   |                  |          |                   |                     |                   |          |       |
| Alcohol Consumption               | 5e-08 | 34   | 0 | -0.15<br>(0.051) | 0.024    | -0.16<br>(0.16)   | -0.12<br>(0.071).   | -0.14<br>(0.097)  | 0.605    | 0.98  |
| Moderate-to-vigorous PA           | 5e-08 | 18   | 0 | 0.25<br>(0.072)  | 0.01     | 0.55<br>(0.3).    | 0.27<br>(0.1)**     | 0.26<br>(0.16)    | 0.543    | 0.3   |
| Depressive Symptoms               | 5e-08 | 15   | 1 | 0.5<br>(0.15)    | 0.011    | 2.2<br>(0.68)**   | 0.58<br>(0.21)**    | -0.09<br>(0.46)   | 0.324    | 0.027 |
| Major Depressive Disorder         | 5e-08 | 8    | 1 | 0.12<br>(0.032)  | 0.005    | 0.36<br>(0.16).   | 0.12<br>(0.043)**   | 0.14<br>(0.059).  | 0.446    | 0.19  |

**CSF Ptau<sub>181</sub>**

|                     |       |     |   |                  |       |                  |                  |                  |       |      |
|---------------------|-------|-----|---|------------------|-------|------------------|------------------|------------------|-------|------|
| Depressive Symptoms | 5e-06 | 105 | 0 | -0.23<br>(0.088) | 0.067 | -0.65<br>(0.37)* | -0.27<br>(0.13)* | -0.58<br>(0.33). | 0.348 | 0.25 |
|---------------------|-------|-----|---|------------------|-------|------------------|------------------|------------------|-------|------|

**CSF Tau**

|                          |       |     |   |                     |      |                     |                       |                     |       |      |
|--------------------------|-------|-----|---|---------------------|------|---------------------|-----------------------|---------------------|-------|------|
| Diastolic Blood Pressure | 5e-06 | 992 | 0 | -0.0049<br>(0.0015) | 0.01 | -0.008<br>(0.0037)* | -0.0066<br>(0.0025)** | -0.011<br>(0.0057). | 0.264 | 0.37 |
|--------------------------|-------|-----|---|---------------------|------|---------------------|-----------------------|---------------------|-------|------|

**Neuritic Plaques**

|                 |       |    |   |                |      |                 |                |                |       |      |
|-----------------|-------|----|---|----------------|------|-----------------|----------------|----------------|-------|------|
| LDL-Cholesterol | 5e-08 | 81 | 0 | 0.62<br>(0.19) | 0.01 | 0.66<br>(0.32)* | 0.33<br>(0.31) | 0.16<br>(0.44) | 0.248 | 0.89 |
|-----------------|-------|----|---|----------------|------|-----------------|----------------|----------------|-------|------|

|                   |       |     |   |                |       |                |                |                |       |      |
|-------------------|-------|-----|---|----------------|-------|----------------|----------------|----------------|-------|------|
| Total Cholesterol | 5e-06 | 146 | 0 | 0.71<br>(0.17) | 0.002 | 0.61<br>(0.3)* | 0.75<br>(0.3)* | 0.62<br>(0.46) | 0.763 | 0.68 |
|-------------------|-------|-----|---|----------------|-------|----------------|----------------|----------------|-------|------|

**Neurofibrillary Tangles**

|                   |          |     |   |                |       |                 |                |                |       |      |
|-------------------|----------|-----|---|----------------|-------|-----------------|----------------|----------------|-------|------|
| Total Cholesterol | 5.00E-06 | 147 | 1 | 0.33<br>(0.11) | 0.019 | 0.091<br>(0.22) | 0.15<br>(0.19) | 0.21<br>(0.21) | 0.011 | 0.18 |
|-------------------|----------|-----|---|----------------|-------|-----------------|----------------|----------------|-------|------|

**Vascular Brain Injury**



|                                  |       |      |   |                  |       |                    |                    |                   |        |       |
|----------------------------------|-------|------|---|------------------|-------|--------------------|--------------------|-------------------|--------|-------|
| Diastolic Blood Pressure         | 5e-06 | 1135 | 0 | 0.048<br>(0.014) | 0.01  | 0.08<br>(0.035)*   | 0.049<br>(0.023)*  | 0.056<br>(0.059)  | 0.6004 | 0.31  |
| Systolic Blood Pressure          | 5e-06 | 1111 | 0 | 0.03<br>(0.0084) | 0.008 | 0.066<br>(0.021)** | 0.036<br>(0.014)*  | 0.032<br>(0.035)  | 0.6929 | 0.062 |
| Pulse Pressure                   | 5e-08 | 543  | 0 | 0.062<br>(0.015) | 0.002 | 0.12<br>(0.041)**  | 0.055<br>(0.023)*  | 0.03<br>(0.068)   | 0.1518 | 0.12  |
| <b><u>Hippocampal Volume</u></b> |       |      |   |                  |       |                    |                    |                   |        |       |
| Total Cholesterol                | 5e-06 | 148  | 0 | -0.065<br>(0.02) | 0.011 | -0.032<br>(0.038)  | -0.076<br>(0.035)* | -0.056<br>(0.035) | 0.0037 | 0.28  |
| Hearing Problems                 | 5e-06 | 110  | 0 | 0.39<br>(0.15)   | 0.075 | 0.9<br>(0.41)*     | 0.29<br>(0.22)     | 0.34<br>(0.56)    | 0.664  | 0.19  |
| Insomnia Symptoms                | 5e-08 | 14   | 0 | -0.2<br>(0.071)  | 0.038 | 0.044<br>(0.28)    | -0.11<br>(0.1)     | -0.061<br>(0.15)  | 0.1    | 0.38  |
| Major Depressive Disorder        | 5e-08 | 8    | 0 | 0.18<br>(0.07)   | 0.081 | 0.84<br>(0.38)     | 0.23<br>(0.095)*   | 0.25<br>(0.14)    | 0.511  | 0.12  |

202 “.” p < 0.1; \* p < 0.05; \*\* p < 0.01; \*\*\* p < 0.001.; IVW = Inverse-variance weighted; WME = Weighted Median Estimator; WMBE =

203 Weighted Mode Based Estimator

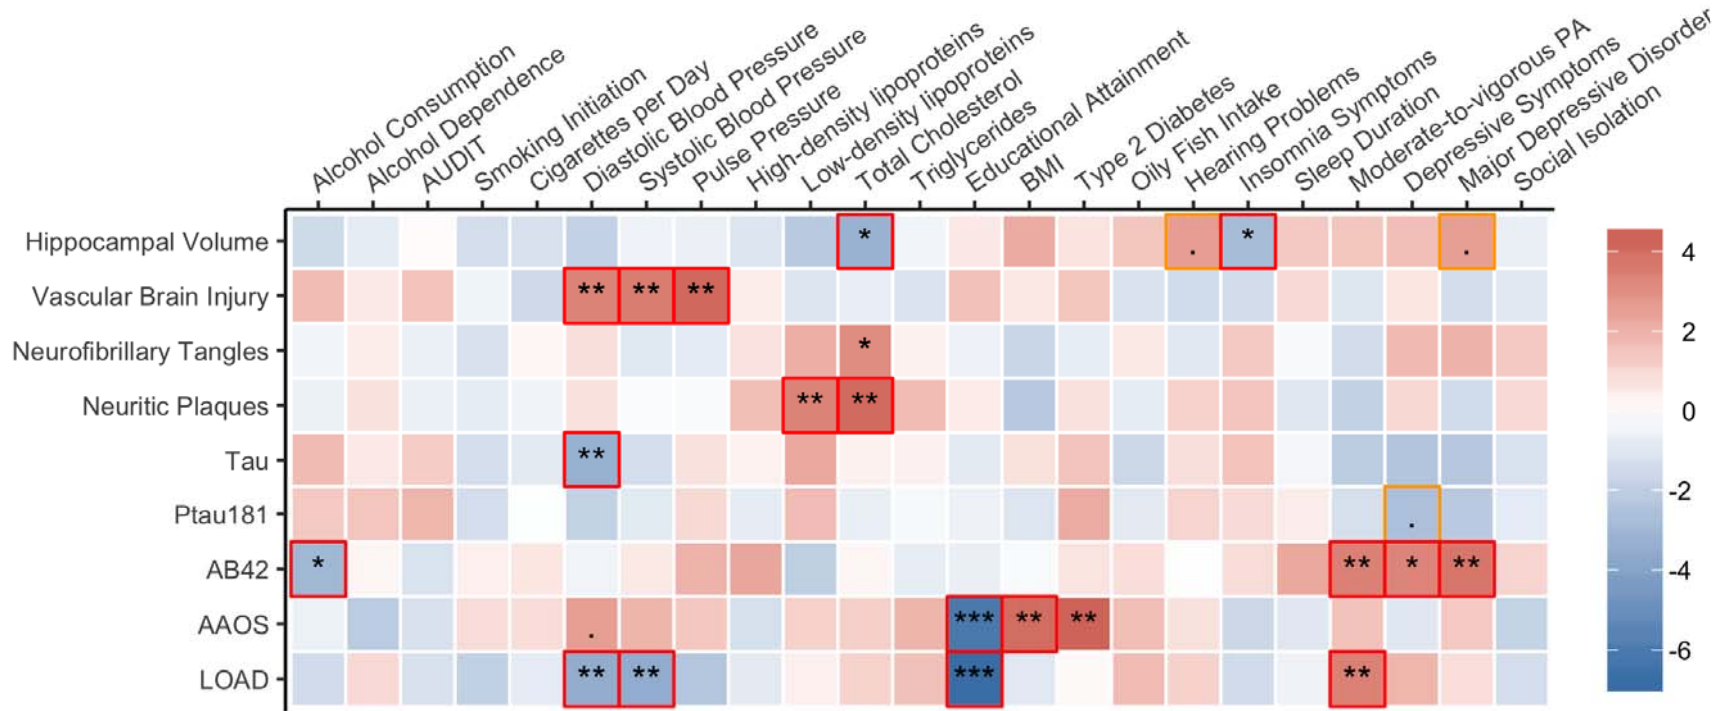

204

205 Figure 1: **Putative causal associations between modifiable risk factors and the AD phenome.** Shown are the best IVW results for each causal  
 206 association, with colors representing the standardized effect sizes - for LOAD, NP, NFT, and AAOS red indicates increased risk / earlier onset and  
 207 blue reduced risk / delayed onset, for CSF levels and Hippocampal volume, red indicates increased levels/volume and blue reduced  
 208 levels/volume. "." FDR < 0.1; \* FDR < 0.05; \*\* FDR < 0.01; \*\*\* FDR < 0.001. Causal estimates bracketed in red or orange indicate significant  
 209 causal effects that showed no evidence for horizontal pleiotropy or where sensitivity analyses were also significant.

210 developing AD after outlier removal (OR [CI]: 2.5 [1.47, 4.23]), with no evidence of  
211 heterogeneity or directional pleiotropy observed.

212

### 213 **Alzheimer's Age of Onset Survival**

214 Genetically predicted higher BMI was associated with significantly earlier AAOS after outlier  
215 removal (HR [CI]: 1.13 [1.07, 1.2]). There was evidence of heterogeneity, but not of directional  
216 pleiotropy, however, the associations were consistent in the WME sensitivity analysis.  
217 Genetically predicted higher educational attainment was associated with significantly later age  
218 at onset of AD after outlier removal (HR [CI]: 0.74 [0.68, 0.82]). There was evidence of  
219 directional pleiotropy, but not of heterogeneity, however, the associations were consistent in the  
220 WME sensitivity analysis.

221

222

### 223 **CSF A $\beta_{42}$ , Tau, and ptau $_{181}$**

224 Genetically predicted higher alcohol consumption was associated with significantly reduced  
225 CSF A $\beta_{42}$  ( $\beta$  [CI]: -0.15 [-0.25, -0.05]), with no evidence of heterogeneity or directional  
226 pleiotropy. Genetically predicted risk of depressive symptoms were associated with significantly  
227 increased A $\beta_{42}$  after outlier removal ( $\beta$  [CI]: 0.5 [0.2, 0.8]). There was evidence of directional  
228 pleiotropy, but not of heterogeneity, however, the associations were consistent in the MR-Egger  
229 and WME sensitivity analyses. Depressive symptoms were also nominally associated (FDR <  
230 0.1) with reduced ptau $_{181}$ . Additionally, genetically predicted risk of MDD was also associated  
231 with significantly increased A $\beta_{42}$  after outlier removal ( $\beta$  [CI]: 0.12 [0.05, 0.18]), with no evidence  
232 of heterogeneity or directional pleiotropy. Genetically predicted increased MVPA was associated  
233 with significantly increased A $\beta_{42}$  ( $\beta$  [CI]: 0.25 [0.1, 0.39]), with no evidence of heterogeneity or  
234 directional pleiotropy observed. Genetically predicted higher DBP was associated with

235 significantly reduced Tau ( $\beta$  [CI]: -0.005 [-0.007, -0.002]), with no evidence of heterogeneity or  
236 directional pleiotropy.

237  
238

### 239 **Vascular Brain Injury, Neuritic Plaque, and Neurofibrillary Tangle Burden**

240 Genetically predicted higher DBP (OR [CI]: 1.05 [1.02, 1.08]), SBP (OR [CI]: 1.06 [1.03, 1.1]),  
241 and PP (OR [CI]: 1.03 [1.01, 1.05]) were associated with significantly increased odds of vascular  
242 brain injury. There was no evidence of heterogeneity or directional pleiotropy for these  
243 exposure-outcome pairs. Significantly increased odds of Neuritic plaque burden were observed  
244 for genetically predicted higher LDL-cholesterol (OR [CI]: 1.87 [1.3, 2.69]) and total cholesterol  
245 (OR [CI]: 2.03 [1.44, 2.85]), with no evidence of heterogeneity or directional pleiotropy observed.  
246 No robust associations were observed with Neurofibrillary Tangle burden.

247

### 248 **Hippocampal Volume**

249 Genetically predicted risk of insomnia symptoms were associated with significantly reduced  
250 hippocampal volume ( $\beta$  [CI]: -0.2 [-0.34, -0.06]), with no evidence of heterogeneity or directional  
251 pleiotropy. Genetically predicted higher total cholesterol was associated with significantly  
252 reduced hippocampal volume ( $\beta$  [CI]: -0.06 [-0.1, -0.03]). There was evidence of heterogeneity,  
253 but not of directional pleiotropy, however, the associations were consistent in the WME  
254 sensitivity analysis. Additionally, risk of hearing problems and risk MDD were nominally  
255 associated (FDR < 0.1) with increased hippocampal volume.

256

### 257 **Discussion**

258 Using genetic variants as proxies for modifiable risk factors, this MR analysis is the first to  
259 investigate the association of modifiable risk factors with the AD phenome. We found evidence  
260 of causal associations for educational attainment, BMI, blood pressure, lipid traits, insomnia  
261 symptoms, physical activity, depression, and alcohol consumption, on either AD or its  
262 associated endophenotypes.

263  
264 Higher educational attainment was causally associated with a reduced risk of AD, which is  
265 consistent with previous MR analyses [42–44]. However, a multivariable MR analysis that  
266 accounted for intelligence in addition to educational attainment suggests that the relationship  
267 between education and AD is largely driven by intelligence [45]. Two of these studies [43,45]  
268 used a smaller GWAS of educational attainment that explained less phenotypic variance than  
269 the GWAS that was used in this analysis. One study used the same GWAS used in this analysis  
270 [46], while the other conducted a single sample MR analysis [44]. The MR analyses are also  
271 consistent with the observational literature [47]. We also observed a novel causal association  
272 between higher education and delayed AAOS, consistent with the cognitive reserve hypothesis.  
273 The observational literature, however, suggests that lower education is associated with delayed  
274 age at onset, however, this association is potentially confounded due to the symptoms of AD  
275 being recognized later among those with less education [48]. Additionally, we found no evidence  
276 that education is causally associated with AD neuropathology or CSF biomarkers, corroborating  
277 evidence from observational studies [49], and supports the hypothesis that education mitigates  
278 dementia risk via cognitive reserve rather than affecting AD pathogenesis [50].

279  
280 BMI was causally associated with an earlier AAOS but was not associated with AD risk or other  
281 endophenotypes. Previous MR analyses have found that BMI is not a causal risk for AD  
282 [43,51,62,63] using smaller GWAS of BMI than used in our analysis, however, no previous MR  
283 study has evaluated the causal effect of BMI on age at onset. In contrast, observational studies

284 have observed that a higher midlife BMI is associated with increased risk of dementia, while  
285 late-life obesity has an apparent protective effect likely due to reverse causation [64–66].  
286 Consistent with our AOS results, midlife obesity is also associated with an earlier age of onset  
287 [67].

288

289 Increased DBP and SBP were causally associated with reduced AD risk, and, in addition to PP,  
290 associated with increased risk of VBI. Additionally, higher DBP was associated with reduced  
291 CSF tau levels. This corroborates the results from a previous MR analysis based on 24 variants  
292 but contradicts those of a more recent MR study that found no evidence of a causal association  
293 based on an instrument composed of 105 variants [43,51]. In contrast to these previous  
294 analyses, we selected instruments from a larger GWAS of blood pressure. Based on  
295 epidemiological research, high blood pressure in midlife is generally regarded as a risk factor for  
296 dementia in midlife while low blood pressure in late-life has been associated with an increased  
297 risk of dementia [5,52]. However, systematic reviews and meta-analysis of the role of  
298 hypertension in midlife, have observed that hypertension in midlife is associated with an  
299 increased risk of developing vascular dementia but not with AD [53–55]. Additionally,  
300 randomized control trials in elderly populations using either a pharmacotherapeutic or lifestyle  
301 change blood pressure lowering interventions did not significantly reduce the risk of dementia  
302 [56]. Our MR analysis also suggests that reducing blood pressure in late life may have limited  
303 utility in the prevention of AD, but may reduce the risk of vascular dementia by reducing the risk  
304 of VBI.

305

306 Increased LDL-cholesterol and total cholesterol were causally associated with an increased risk  
307 of neuritic plaques, corroborating previous observational studies that have reported associations  
308 between increased total plasma cholesterol levels and amyloid deposition [57,58]. We did not  
309 observe a causal association with AD risk, which is consistent with three previous MR analysis

310 of lipid traits on the risk of AD [43,51,59]. This study and the previous studies all used the same  
311 GWAS for selecting instruments associated with lipid traits. However, these results contrast with  
312 observational studies that have found higher midlife total cholesterol associated with an  
313 increased risk of AD and all-cause dementia, while higher late-life total cholesterol is not  
314 associated with all-cause dementia or dementia subtypes [60]. Furthermore, in cognitively intact  
315 individuals statins are associated with a reduced risk of all-cause dementia, AD, and MCI, but  
316 not VaD [61].

317

318 Insomnia symptoms were associated with reduced hippocampal volume but not with AD or  
319 other AD endophenotypes. Sleep duration was not causally associated with the AD phenome.  
320 Observational studies have indicated that sleep disturbances and problems are associated with  
321 an increased risk of all-cause dementia, AD and vascular dementia [68,69]. However, the  
322 association between insomnia and hippocampal volume is less established with studies either  
323 reporting a positive relationship [70,71] or no association [72]. The results of this study provide  
324 further support for insomnia being causally related to reduced hippocampal volumes and  
325 underlines the importance of sleep for brain health.

326

327 Increased MVPA was associated with increased CSF  $A\beta_{42}$  levels, but also with an increased  
328 risk of AD. Increased physical activity is generally associated with a reduced risk of dementia  
329 [5], however, a recent meta-analysis found that the protective association with dementia was  
330 observed when physical activity was measured <10 years before dementia diagnosis, but when  
331 measured >10 years before dementia onset no association with dementia was observed [73].  
332 Similarly, randomized control trials of single component physical activity interventions have not  
333 been shown to reduce the risk of dementia [74]. Less research has been conducted on the  
334 relationship between physical activity and AD  $A\beta$  biomarkers, however, increased physical  
335 activity has been associated with favorable AD  $A\beta_{42}$  biomarker profiles [75–77].

336

337 Broad depressive symptoms and a clinical diagnosis of MDD were associated with increased  
338 CSF  $A\beta_{42}$ . Observational studies have indicated that depression is associated with a twofold  
339 increased risk of dementia, however, the late-life depressive symptoms may represent a  
340 prodromal phase of dementia while early life depression may be a risk factor for AD [78,79]. In  
341 cross-sectional observational studies, lower  $A\beta_{42}$  levels are associated with depression [80]. In  
342 longitudinal studies elevated baseline  $A\beta_{42}$  levels are associated with increased risk of  
343 developing depression, suggesting that emerging depressive symptoms are an early  
344 manifestation of AD [81–83].

345

346 Increased alcohol consumption was causally associated with lower CSF  $A\beta_{42}$  levels. A previous  
347 MR study found no evidence of an association between alcohol consumption and AD risk,  
348 though this analysis was likely underpowered as the instrument only consisted of two SNPs  
349 [43]. Observational studies have indicated that light-moderate alcohol intake is associated with a  
350 decreased risk of AD while abstinence or heavy alcohol use is associated with an overall  
351 increased risk of AD [84]. The observational studies, however, are potentially confounded by  
352 selection bias, survivor bias, the inclusion of lifetime abstainers and former drinkers into control  
353 groups [84].

354

355 A suggestive causal association was observed between T2D and an earlier age of onset.  
356 However, there was evidence of heterogeneity, and the sensitivity analyses were non-  
357 significant. Previous MR analyses have not found evidence of a causal relationship between  
358 T2D, fasting glucose or fasting insulin with the risk of AD [43,51,85]. Conversely, observational  
359 studies have found an increased risk of dementia in patients with diabetes [86] and that  
360 metformin, a first line antihyperglycemic medication, prevents or delays the development of  
361 dementia in patients with diabetes [87].



362

363 There was no evidence of a causal association between smoking initiation or smoking quantity  
364 and the AD phenome. This contradicts two previous MR studies which found evidence of a  
365 protective effect of increased smoking quantity on AD risk [43,51], using only three SNPs  
366 selected from a smaller smoking GWAS [88]. These apparent protective effects may be due to  
367 survivor bias [89]. In contrast, the analysis presented here used data from the most recent  
368 GWAS on smoking behavior, using between 95 and 316 variants. Observational studies,  
369 however, implicate smoking as a risk factor for AD, with current smokers been at increased risk  
370 in comparison to never smokers [90].

371

372 There was no evidence of an association between increased oily fish consumption and the AD  
373 phenome. Observational studies have reported conflicting results for the association of fish  
374 consumption and risk of AD, with a systematic review focusing on dietary patterns finding limited  
375 evidence of an association [91,92], while a more recent analysis found an association with  
376 reduced risk [93].

377

378 A nominal association was observed between hearing problems and increased hippocampal  
379 volume, but that there was no evidence of a causal relationship with AD or AD endophenotypes.  
380 These results are contradictory to the observational literature which has found that hearing loss  
381 is associated with decreased total brain volume [94], accelerated brain atrophy in whole brain  
382 [95] and reduced hippocampal volume [96]. Similarly, age-related hearing loss is associated  
383 with cognitive decline, cognitive impairment, and all-cause dementia, though no association was  
384 observed for AD [97].

385

386 The results of this study should be interpreted in conjunction with knowledge of its limitations  
387 and those of MR in general. Firstly, inference of causality in MR analyses relies on the

388 assumption that the genetic variants used as instruments are strongly associated with the  
389 exposure (the non-zero effect assumption). While we cannot exclude that our findings may be  
390 affected by weak instrument bias, the F-statistics for all of the analyses were over 10 indicating  
391 that the instrument strength was sufficient for MR analysis [32]. However, in Two-Sample MR  
392 analyses, weak instrument bias is in the direction of the null, thus, we cannot exclude type II  
393 error as an explanation for the null results that had limited power [98]. Second, we cannot  
394 completely rule out violations of the independence and the exclusion restriction assumption,  
395 particularly in regard to pleiotropy [99]. Nevertheless, we used several methods to identify  
396 robust causal estimates, including outlier removal using MR-PRESSO and WMBE, WME and  
397 MR-Egger sensitivity analyses. Thirdly, it is assumed that both samples used to generate the  
398 GWAS summary statistics used in the MR model come from comparable populations. In  
399 evaluating the demographics of the studies used in this analysis, the exposures have an  
400 average age ranging from 56.1 – 63.8yrs while outcomes, with the exception of hippocampal  
401 volume, have an average age ranging from 71 – 74.7yrs. As such, some of the results reported  
402 here may be subject to survivor bias whereby mortality due to competing risks affects selection  
403 into the target study [89]. Nevertheless, the bias introduced by survival effects is large for  
404 exposures that strongly affect survival, however, when selection effects are weak or moderate,  
405 selection bias does not adversely affect causal estimates [89]. Finally, these analyses were  
406 conducted using GWAS from European populations, limiting their generalizability to other  
407 populations. Replicating these findings in non-European populations where there is potentially  
408 greater variability in the modifiable risk factors remains key.

409

410 Despite these limitations, this study has significant strengths. We assessed the causal effect  
411 multiple potential modifiable risk factors on AD endophenotypes in addition to AD risk. In  
412 addition, we selected genetic variants for the exposure that originated from the largest available  
413 GWAS at the time of analysis, and also the most recent GWAS for AD. By utilizing larger GWAS

414 that previous MR analyses, we were able to include a larger number of instruments that explain  
415 a greater proportion of the phenotypic variance of the exposures, resulting in increased the  
416 statistical power for this analysis.

417

418 In conclusion, this study used large exposure and outcome GWAS in MR studies to evaluate the  
419 causal associations of modifiable risk factors with the AD phenome. We found evidence of  
420 causal associations of alcohol consumption, blood pressure, cholesterol traits, educational  
421 attainment BMI, hearing problems, insomnia symptoms, physical activity, and depressive  
422 symptoms on either AD or its associated endophenotypes. Around 29.5% of dementia cases  
423 can be attributed to educational attainment, hypertension, BMI, hearing loss and physical  
424 activity. Evidence of causal relationships on the AD phenome strongly supports that  
425 interventions targeting these modifiable risk factors could reduce the individual risk of  
426 developing AD and alter AD population prevalence.

427

#### 428 **Acknowledgments**

429 This analysis was possible due to the generous sharing of genome-wide association summary  
430 statistics.

431

#### 432 **Funding**

433 SJA, AMG and EM were supported by the JPB Foundation (<http://www.jpbfoundation.org>). The  
434 funders had no role in study design, data collection and analysis, decision to publish, or  
435 preparation of the manuscript.

436

#### 437 **Conflicts of Interest**

438 SJA has no conflicts of interest to declare.

439 EM has no conflicts of interest to declare.

440 AMG served on the scientific advisory board for Denali Therapeutics from 2015-2018. She has  
441 also served as a consultant for Biogen, AbbVie, Pfizer, GSK, Eisai and Illumina.

442

#### 443 **Data availability**

444 This study used published summary results from published research papers, with the references  
445 for those studies provided in the main paper. S1 Table provides the harmonized SNP effects  
446 need to reproduce the results of this analysis.

#### 447 **Supplementary Tables**

448 S1 Table: Harmonized exposure-outcome SNPs used in Mendelian randomization analysis

449 S2 Table: Mendelian Randomization causal estimates

450

## 451 References

- 452 1. Masters CL, Bateman R, Blennow K, Rowe CC, Sperling RA, Cummings JL. Alzheimer's  
453 disease. *Nat Rev Dis Primers*. 2015;1: 15056.
- 454 2. Mhatre SD, Tsai CA, Rubin AJ, James ML, Andreasson KI. Microglial malfunction: the third  
455 rail in the development of Alzheimer's disease. *Trends Neurosci*. 2015;38: 621–636.
- 456 3. Prince MJ. World Alzheimer Report 2015: The Global Impact of Dementia: an Analysis of  
457 Prevalence, Incidence, Cost and Trends. 2015.
- 458 4. Baumgart M, Snyder HM, Carrillo MC, Fazio S, Kim H, Johns H. Summary of the evidence  
459 on modifiable risk factors for cognitive decline and dementia: A population-based  
460 perspective. *Alzheimers Dement*. Elsevier; 2015;11: 718–726.
- 461 5. Livingston G, Sommerlad A, Orgeta V, Costafreda SG, Huntley J, Ames D, et al. Dementia  
462 prevention, intervention, and care. *Lancet*. 2017;390: 2673–2734.
- 463 6. Davey Smith G, Ebrahim S. "Mendelian randomization": can genetic epidemiology  
464 contribute to understanding environmental determinants of disease? *Int J Epidemiol*. Oxford  
465 University Press; 2003;32: 1–22.
- 466 7. Burgess S, Scott RA, Timpson NJ, Davey Smith G, Thompson SG, EPIC- InterAct  
467 Consortium. Using published data in Mendelian randomization: a blueprint for efficient  
468 identification of causal risk factors. *Eur J Epidemiol*. Springer; 2015;30: 543–552.
- 469 8. Liu M, Jiang Y, Wedow R, Li Y, Brazel DM, Chen F, et al. Association studies of up to 1.2  
470 million individuals yield new insights into the genetic etiology of tobacco and alcohol use.  
471 *Nat Genet*. 2019; doi:10.1038/s41588-018-0307-5
- 472 9. Sanchez-Roige S, Palmer AA, Fontanillas P, Elson SL, 23andMe Research Team,  
473 Substance Use Disorder Working Group of the Psychiatric Genomics Consortium, et al.  
474 Genome-Wide Association Study Meta-Analysis of the Alcohol Use Disorders Identification  
475 Test (AUDIT) in Two Population-Based Cohorts. *Am J Psychiatry*. 2018;  
476 [appiajp201818040369](https://doi.org/10.1176/appiajp201818040369).
- 477 10. Walters RK, Polimanti R, Johnson EC, McClintick JN, Adams MJ, Adkins AE, et al.  
478 Transancestral GWAS of alcohol dependence reveals common genetic underpinnings with  
479 psychiatric disorders. *Nat Neurosci*. 2018;21: 1656–1669.
- 480 11. Klimentidis YC, Raichlen DA, Bea J, Garcia DO, Wineinger NE, Mandarino LJ, et al.  
481 Genome-wide association study of habitual physical activity in over 377,000 UK Biobank  
482 participants identifies multiple variants including *CADM2* and *APOE*. *Int J Obes* . 2018;42:  
483 1161–1176.
- 484 12. Willer CJ, Schmidt EM, Sengupta S, Peloso GM, Gustafsson S, Kanoni S, et al. Discovery  
485 and refinement of loci associated with lipid levels. *Nat Genet*. Nature Publishing Group;  
486 2013;45: 1274–1283.
- 487 13. Evangelou E, Warren HR, Mosen-Ansorena D, Mifsud B, Pazoki R, Gao H, et al. Genetic  
488 analysis of over 1 million people identifies 535 new loci associated with blood pressure

- 489 traits. *Nat Genet.* 2018;50: 1412–1425.
- 490 14. Xue A, Wu Y, Zhu Z, Zhang F, Kemper KE, Zheng Z, et al. Genome-wide association  
491 analyses identify 143 risk variants and putative regulatory mechanisms for type 2 diabetes.  
492 *Nat Commun.* 2018;9: 2941.
- 493 15. Yengo L, Sidorenko J, Kemper KE, Zheng Z, Wood AR, Weedon MN, et al. Meta-analysis  
494 of genome-wide association studies for height and body mass index in  $\approx 700000$  individuals  
495 of European ancestry. *Hum Mol Genet.* 2018;27: 3641–3649.
- 496 16. Howard DM, Adams MJ, Shirali M, Clarke T-K, Marioni RE, Davies G, et al. Genome-wide  
497 association study of depression phenotypes in UK Biobank identifies variants in excitatory  
498 synaptic pathways. *Nat Commun.* 2018;9: 1470.
- 499 17. Wray NR, Ripke S, Mattheisen M, Trzaskowski M, Byrne EM, Abdellaoui A, et al. Genome-  
500 wide association analyses identify 44 risk variants and refine the genetic architecture of  
501 major depression. *Nat Genet.* 2018;50: 668–681.
- 502 18. Jansen PR, Watanabe K, Stringer S, Skene N, Bryois J, Hammerschlag AR, et al.  
503 Genome-wide analysis of insomnia in 1,331,010 individuals identifies new risk loci and  
504 functional pathways. *Nat Genet.* 2019; doi:10.1038/s41588-018-0333-3
- 505 19. Dashti HS, Jones SE, Wood AR, Lane JM, van Hees VT, Wang H, et al. Genome-wide  
506 association study identifies genetic loci for self-reported habitual sleep duration supported  
507 by accelerometer-derived estimates. *Nat Commun.* 2019;10: 1100.
- 508 20. Day FR, Ong KK, Perry JRB. Elucidating the genetic basis of social interaction and  
509 isolation. *Nat Commun.* 2018;9: 2457.
- 510 21. Lee JJ, Wedow R, Okbay A, Kong E, Maghzian O, Zacher M, et al. Gene discovery and  
511 polygenic prediction from a genome-wide association study of educational attainment in 1.1  
512 million individuals. *Nat Genet.* 2018;50: 1112–1121.
- 513 22. Kunkle BW, Grenier-Boley B, Sims R, Bis JC, Damotte V, Naj AC, et al. Genetic meta-  
514 analysis of diagnosed Alzheimer's disease identifies new risk loci and implicates A $\beta$ , tau,  
515 immunity and lipid processing. *Nat Genet.* 2019; doi:10.1038/s41588-019-0358-2
- 516 23. Huang K-L, Marcora E, Pimenova AA, Di Narzo AF, Kapoor M, Jin SC, et al. A common  
517 haplotype lowers PU.1 expression in myeloid cells and delays onset of Alzheimer's  
518 disease. *Nat Neurosci.* 2017;20: 1052–1061.
- 519 24. Deming Y, Li Z, Kapoor M, Harari O, Del-Aguila JL, Black K, et al. Genome-wide  
520 association study identifies four novel loci associated with Alzheimer's endophenotypes and  
521 disease modifiers. *Acta Neuropathol.* 2017;133: 839–856.
- 522 25. Beecham GW, Hamilton K, Naj AC, Martin ER, Huentelman M, Myers AJ, et al. Genome-  
523 wide association meta-analysis of neuropathologic features of Alzheimer's disease and  
524 related dementias. *PLoS Genet. Public Library of Science;* 2014;10: e1004606.
- 525 26. Hibar DP, Adams HHH, Jahanshad N, Chauhan G, Stein JL, Hofer E, et al. Novel genetic  
526 loci associated with hippocampal volume. *Nat Commun.* 2017;8: 13624.
- 527 27. Lambert JC, Ibrahim-Verbaas CA, Harold D, Naj AC, Sims R, Bellenguez C, et al. Meta-

- 528 analysis of 74,046 individuals identifies 11 new susceptibility loci for Alzheimer's disease.  
529 Nat Genet. Nature Publishing Group; 2013;45: 1452–1458.
- 530 28. Hibar DP, Stein JL, Renteria ME, Arias-Vasquez A, Desrivieres S, Jahanshad N, et al.  
531 Common genetic variants influence human subcortical brain structures. Nature. Nature  
532 Publishing Group, a division of Macmillan Publishers Limited. All Rights Reserved.;  
533 2015;520: 224–229.
- 534 29. Kent WJ, Sugnet CW, Furey TS, Roskin KM, Pringle TH, Zahler AM, et al. The human  
535 genome browser at UCSC. Genome Res. 2002;12: 996–1006.
- 536 30. Purcell S, Neale B, Todd-Brown K, Thomas L, Ferreira MAR, Bender D, et al. PLINK: a tool  
537 set for whole-genome association and population-based linkage analyses. Am J Hum  
538 Genet. University of Chicago Press; 2007;81: 559–575.
- 539 31. Shim H, Chasman DI, Smith JD, Mora S, Ridker PM, Nickerson DA, et al. A multivariate  
540 genome-wide association analysis of 10 LDL subfractions, and their response to statin  
541 treatment, in 1868 Caucasians. PLoS One. 2015;10: e0120758.
- 542 32. Burgess S, Thompson SG, CRP CHD Genetics Collaboration. Avoiding bias from weak  
543 instruments in Mendelian randomization studies. Int J Epidemiol. 2011;40: 755–764.
- 544 33. Bowden J, Davey Smith G, Haycock PC, Burgess S. Consistent Estimation in Mendelian  
545 Randomization with Some Invalid Instruments Using a Weighted Median Estimator. Genet  
546 Epidemiol. Wiley Subscription Services, Inc., A Wiley Company; 2016;40: 304–314.
- 547 34. Hartwig FP, Davey Smith G, Bowden J. Robust inference in summary data Mendelian  
548 randomization via the zero modal pleiotropy assumption. Int J Epidemiol. 2017;46: 1985–  
549 1998.
- 550 35. Bowden J, Davey Smith G, Burgess S. Mendelian randomization with invalid instruments:  
551 effect estimation and bias detection through Egger regression. Int J Epidemiol. 2015;44:  
552 512–525.
- 553 36. Verbanck M, Chen C-Y, Neale B, Do R. Detection of widespread horizontal pleiotropy in  
554 causal relationships inferred from Mendelian randomization between complex traits and  
555 diseases. Nat Genet. 2018;50: 693–698.
- 556 37. Storey JD. A direct approach to false discovery rates. J R Stat Soc Series B Stat Methodol.  
557 Wiley Online Library; 2002; Available:  
558 <https://rss.onlinelibrary.wiley.com/doi/abs/10.1111/1467-9868.00346>
- 559 38. Brion M-JA, Shakhbazov K, Visscher PM. Calculating statistical power in Mendelian  
560 randomization studies. Int J Epidemiol. 2013;42: 1497–1501.
- 561 39. Ihaka R, Gentleman R. R: A Language for Data Analysis and Graphics. J Comput Graph  
562 Stat. Taylor & Francis; 1996;5: 299–314.
- 563 40. Hemani G, Zheng J, Elsworth B, Wade KH, Haberland V, Baird D, et al. The MR-Base  
564 platform supports systematic causal inference across the human phenome. Elife. 2018;7.  
565 doi:10.7554/eLife.34408
- 566 41. Köster J, Rahmann S. Snakemake--a scalable bioinformatics workflow engine.



- 567            Bioinformatics. 2012;28: 2520–2522.
- 568    42. Raghavan NS, Vardarajan B, Mayeux R. Genomic variation in educational attainment  
569        modifies Alzheimer disease risk. *Neurology Genetics*. Wolters Kluwer Health, Inc. on behalf  
570        of the American Academy of Neurology; 2019;5: e310.
- 571    43. Larsson SC, Traylor M, Malik R, Dichgans M, Burgess S, Markus HS, et al. Modifiable  
572        pathways in Alzheimer's disease: Mendelian randomisation analysis. *BMJ*. 2017;359:  
573        j5375.
- 574    44. Nguyen TT, Tchetgen Tchetgen EJ, Kawachi I, Gilman SE, Walter S, Liu SY, et al.  
575        Instrumental variable approaches to identifying the causal effect of educational attainment  
576        on dementia risk. *Ann Epidemiol*. 2016;26: 71–6.e1–3.
- 577    45. Anderson EL, Howe LD, Wade KH, Ben-Shlomo Y, David Hill W, Deary IJ, et al. Education,  
578        intelligence and Alzheimer's disease: Evidence from a multivariable two-sample Mendelian  
579        randomization study [Internet]. *bioRxiv*. 2018. p. 401042. doi:10.1101/401042
- 580    46. Raghavan N, Tosto G. Genetics of Alzheimer's Disease: the Importance of Polygenic and  
581        Epistatic Components. *Curr Neurol Neurosci Rep*. 2017;17: 78.
- 582    47. Caamaño-Isorna F, Corral M, Montes-Martínez A, Takkouche B. Education and dementia:  
583        a meta-analytic study. *Neuroepidemiology*. 2006;26: 226–232.
- 584    48. Roe CM, Xiong C, Grant E, Miller JP, Morris JC. Education and reported onset of  
585        symptoms among individuals with Alzheimer disease. *Arch Neurol*. 2008;65: 108–111.
- 586    49. Brayne C, Ince PG, Keage HAD, McKeith IG, Matthews FE, Polvikoski T, et al. Education,  
587        the brain and dementia: neuroprotection or compensation? *EClipSE Collaborative Members*.  
588        *Brain*. Narnia; 2010;133: 2210–2216.
- 589    50. Stern Y. Cognitive reserve in ageing and Alzheimer's disease. *Lancet Neurol*. Elsevier;  
590        2012;11: 1006–1012.
- 591    51. Østergaard SD, Mukherjee S, Sharp SJ, Proitsi P, Lotta LA, Day F, et al. Associations  
592        between Potentially Modifiable Risk Factors and Alzheimer Disease: A Mendelian  
593        Randomization Study. *PLoS Med*. Public Library of Science; 2015;12: e1001841;  
594        discussion e1001841.
- 595    52. Kivipelto M, Mangialasche F, Ngandu T. Lifestyle interventions to prevent cognitive  
596        impairment, dementia and Alzheimer disease. *Nat Rev Neurol*. 2018;14: 653–666.
- 597    53. Power MC, Weuve J, Gagne JJ, McQueen MB, Viswanathan A, Blacker D. The association  
598        between blood pressure and incident Alzheimer disease: a systematic review and meta-  
599        analysis. *Epidemiology*. Lippincott Williams & Wilkins; 2011;22: 646–659.
- 600    54. Sharp SI, Aarsland D, Day S, Sønnesyn H, Alzheimer's Society Vascular Dementia  
601        Systematic Review Group, Ballard C. Hypertension is a potential risk factor for vascular  
602        dementia: systematic review. *Int J Geriatr Psychiatry*. John Wiley & Sons, Ltd.; 2011;26:  
603        661–669.
- 604    55. Guan J-W, Huang C-Q, Li Y-H, Wan C-M, You C, Wang Z-R, et al. No association between  
605        hypertension and risk for Alzheimer's disease: a meta-analysis of longitudinal studies. *J*



- 606           Alzheimers Dis. IOS Press; 2011;27: 799–807.
- 607   56. van Middelaar T, van Vught LA, van Gool WA, Simons EMF, van den Born B-JH, Moll van  
608       Charante EP, et al. Blood pressure-lowering interventions to prevent dementia: a  
609       systematic review and meta-analysis. *J Hypertens*. 2018;36: 1780–1787.
- 610   57. Baranello RJ, Bharani KL, Padmaraju V, Chopra N, Lahiri DK, Greig NH, et al. Amyloid-  
611       beta protein clearance and degradation (ABCD) pathways and their role in Alzheimer's  
612       disease. *Curr Alzheimer Res*. 2015;12: 32–46.
- 613   58. Lesser GT, Beeri MS, Schmeidler J, Purohit DP, Haroutunian V. Cholesterol and LDL relate  
614       to neuritic plaques and to APOE4 presence but not to neurofibrillary tangles. *Curr*  
615       *Alzheimer Res*. 2011;8: 303–312.
- 616   59. Proitsi P, Lupton MK, Velayudhan L, Newhouse S, Fogh I, Tsolaki M, et al. Genetic  
617       predisposition to increased blood cholesterol and triglyceride lipid levels and risk of  
618       Alzheimer disease: a Mendelian randomization analysis. *PLoS Med*. 2014;11: e1001713.
- 619   60. Anstey KJ, Ashby-Mitchell K, Peters R. Updating the Evidence on the Association between  
620       Serum Cholesterol and Risk of Late-Life Dementia: Review and Meta-Analysis. *J*  
621       *Alzheimers Dis*. 2017;56: 215–228.
- 622   61. Chu C-S, Tseng P-T, Stubbs B, Chen T-Y, Tang C-H, Li D-J, et al. Use of statins and the  
623       risk of dementia and mild cognitive impairment: A systematic review and meta-analysis. *Sci*  
624       *Rep*. 2018;8: 5804.
- 625   62. Mukherjee S, Walter S, Kauwe JSK, Saykin AJ, Bennett DA, Larson EB, et al. Genetically  
626       predicted body mass index and Alzheimer's disease-related phenotypes in three large  
627       samples: Mendelian randomization analyses. *Alzheimers Dement*. Elsevier; 2015;11:  
628       1439–1451.
- 629   63. Nordestgaard LT, Tybjaerg-Hansen A, Nordestgaard BG, Frikke-Schmidt R. Body Mass  
630       Index and Risk of Alzheimer's Disease: A Mendelian Randomization Study of 399,536  
631       Individuals. *J Clin Endocrinol Metab*. 2017;102: 2310–2320.
- 632   64. Kivimäki M, Luukkonen R, Batty GD, Ferrie JE, Pentti J, Nyberg ST, et al. Body mass index  
633       and risk of dementia: Analysis of individual-level data from 1.3 million individuals.  
634       *Alzheimers Dement*. 2018;14: 601–609.
- 635   65. Singh-Manoux A, Dugravot A, Shipley M, Brunner EJ, Elbaz A, Sabia S, et al. Obesity  
636       trajectories and risk of dementia: 28 years of follow-up in the Whitehall II Study. *Alzheimers*  
637       *Dement*. 2018;14: 178–186.
- 638   66. Albanese E, Launer LJ, Egger M, Prince MJ, Giannakopoulos P, Wolters FJ, et al. Body  
639       mass index in midlife and dementia: Systematic review and meta-regression analysis of  
640       589,649 men and women followed in longitudinal studies. *Alzheimers Dement*. 2017;8:  
641       165–178.
- 642   67. Chuang Y-F, An Y, Bilgel M, Wong DF, Troncoso JC, O'Brien RJ, et al. Midlife adiposity  
643       predicts earlier onset of Alzheimer's dementia, neuropathology and presymptomatic  
644       cerebral amyloid accumulation. *Mol Psychiatry*. 2016;21: 910–915.

- 645 68. Bubu OM, Brannick M, Mortimer J, Umasabor-Bubu O, Sebastião YV, Wen Y, et al. Sleep,  
646 Cognitive impairment, and Alzheimer's disease: A Systematic Review and Meta-Analysis.  
647 Sleep. 2017;40. doi:10.1093/sleep/zsw032
- 648 69. Shi L, Chen S-J, Ma M-Y, Bao Y-P, Han Y, Wang Y-M, et al. Sleep disturbances increase  
649 the risk of dementia: A systematic review and meta-analysis. Sleep Med Rev. 2018;40: 4–  
650 16.
- 651 70. Elcombe EL, Lagopoulos J, Duffy SL, Lewis SJG, Norrie L, Hickie IB, et al. Hippocampal  
652 volume in older adults at risk of cognitive decline: the role of sleep, vascular risk, and  
653 depression. J Alzheimers Dis. 2015;44: 1279–1290.
- 654 71. Noh HJ, Joo EY, Kim ST, Yoon SM, Koo DL, Kim D, et al. The relationship between  
655 hippocampal volume and cognition in patients with chronic primary insomnia. J Clin Neurol.  
656 2012;8: 130–138.
- 657 72. Winkelman JW, Benson KL, Buxton OM, Lyoo IK, Yoon S, O'Connor S, et al. Lack of  
658 hippocampal volume differences in primary insomnia and good sleeper controls: an MRI  
659 volumetric study at 3 Tesla. Sleep Med. 2010;11: 576–582.
- 660 73. Kivimäki M, Singh-Manoux A, Pentti J, Sabia S, Nyberg ST, Alfredsson L, et al. Physical  
661 inactivity, cardiometabolic disease, and risk of dementia: an individual-participant meta-  
662 analysis. BMJ. 2019;365: l1495.
- 663 74. Brasure M, Desai P, Davila H, Nelson VA, Calvert C, Jutkowitz E, et al. Physical Activity  
664 Interventions in Preventing Cognitive Decline and Alzheimer-Type Dementia: A Systematic  
665 Review. Ann Intern Med. 2018;168: 30–38.
- 666 75. Müller S, Preische O, Sohrabi HR, Gräber S, Jucker M, Ringman JM, et al. Relationship  
667 between physical activity, cognition, and Alzheimer pathology in autosomal dominant  
668 Alzheimer's disease. Alzheimers Dement. 2018;14: 1427–1437.
- 669 76. Law LL, Rol RN, Schultz SA, Dougherty RJ, Edwards DF, Kosciak RL, et al. Moderate  
670 intensity physical activity associates with CSF biomarkers in a cohort at risk for Alzheimer's  
671 disease. Alzheimers Dement. 2018;10: 188–195.
- 672 77. Liang KY, Mintun MA, Fagan AM, Goate AM, Bugg JM, Holtzman DM, et al. Exercise and  
673 Alzheimer's disease biomarkers in cognitively normal older adults. Ann Neurol. 2010;68:  
674 311–318.
- 675 78. Byers AL, Yaffe K. Depression and risk of developing dementia. Nat Rev Neurol. Nature  
676 Publishing Group, a division of Macmillan Publishers Limited. All Rights Reserved.; 2011;7:  
677 323–331.
- 678 79. Cherbuin N, Kim S, Anstey KJ. Dementia risk estimates associated with measures of  
679 depression: a systematic review and meta-analysis. BMJ Open. 2015;5: e008853.
- 680 80. Harrington KD, Lim YY, Gould E, Maruff P. Amyloid-beta and depression in healthy older  
681 adults: a systematic review. Aust N Z J Psychiatry. 2015;49: 36–46.
- 682 81. Harrington KD, Gould E, Lim YY, Ames D, Pietrzak RH, Rembach A, et al. Amyloid burden  
683 and incident depressive symptoms in cognitively normal older adults. Int J Geriatr

- 684            Psychiatry. 2017;32: 455–463.
- 685    82. Donovan NJ, Locascio JJ, Marshall GA, Gatchel J, Hanseeuw BJ, Rentz DM, et al.  
686        Longitudinal Association of Amyloid Beta and Anxious-Depressive Symptoms in Cognitively  
687        Normal Older Adults. *Am J Psychiatry*. 2018;175: 530–537.
- 688    83. Blasko I, Kemmler G, Jungwirth S, Wichart I, Krampla W, Weissgram S, et al. Plasma  
689        amyloid beta-42 independently predicts both late-onset depression and Alzheimer disease.  
690        *Am J Geriatr Psychiatry*. 2010;18: 973–982.
- 691    84. Rehm J, Hasan OSM, Black SE, Shield KD, Schwarzingler M. Alcohol use and dementia: a  
692        systematic scoping review. *Alzheimers Res Ther*. 2019;11: 1.
- 693    85. Walter S, Marden JR, Kubzansky LD, Mayeda ER, Crane PK, Chang S-C, et al. Diabetic  
694        Phenotypes and Late-Life Dementia Risk: A Mechanism-specific Mendelian Randomization  
695        Study. *Alzheimer Dis Assoc Disord*. 2016;30: 15–20.
- 696    86. Biessels GJ, Staekenborg S, Brunner E, Brayne C, Scheltens P. Risk of dementia in  
697        diabetes mellitus: a systematic review. *Lancet Neurol*. 2006;5: 64–74.
- 698    87. Campbell JM, Stephenson MD, de Courten B, Chapman I, Bellman SM, Aromataris E.  
699        Metformin Use Associated with Reduced Risk of Dementia in Patients with Diabetes: A  
700        Systematic Review and Meta-Analysis. *J Alzheimers Dis*. 2018;65: 1225–1236.
- 701    88. Tobacco and Genetics Consortium. Genome-wide meta-analyses identify multiple loci  
702        associated with smoking behavior. *Nat Genet*. Nature Publishing Group; 2010;42: 441–447.
- 703    89. Gkatzionis A, Burgess S. Contextualizing selection bias in Mendelian randomization: how  
704        bad is it likely to be? *Int J Epidemiol*. arxiv.org; 2018; doi:10.1093/ije/dyy202
- 705    90. Zhong G, Wang Y, Zhang Y, Guo JJ, Zhao Y. Smoking is associated with an increased risk  
706        of dementia: a meta-analysis of prospective cohort studies with investigation of potential  
707        effect modifiers. *PLoS One*. Public Library of Science; 2015;10: e0118333.
- 708    91. Cao L, Tan L, Wang H-F, Jiang T, Zhu X-C, Lu H, et al. Dietary Patterns and Risk of  
709        Dementia: a Systematic Review and Meta-Analysis of Cohort Studies. *Mol Neurobiol*.  
710        Humana Press Inc; 2016;53: 6144–6154.
- 711    92. Solfrizzi V, Custodero C, Lozupone M, Imbimbo BP, Valiani V, Agosti P, et al. Relationships  
712        of Dietary Patterns, Foods, and Micro- and Macronutrients with Alzheimer’s Disease and  
713        Late-Life Cognitive Disorders: A Systematic Review. *J Alzheimers Dis*. 2017;59: 815–849.
- 714    93. Bakre AT, Chen R, Khutan R, Wei L, Smith T, Qin G, et al. Association between fish  
715        consumption and risk of dementia: a new study from China and a systematic literature  
716        review and meta-analysis. *Public Health Nutr*. 2018;21: 1921–1932.
- 717    94. Rigtters SC, Bos D, Metselaar M, Roshchupkin GV, Baatenburg de Jong RJ, Ikram MA, et  
718        al. Hearing Impairment Is Associated with Smaller Brain Volume in Aging. *Front Aging  
719        Neurosci*. 2017;9: 2.
- 720    95. Lin FR, Ferrucci L, An Y, Goh JO, Doshi J, Metter EJ, et al. Association of hearing  
721        impairment with brain volume changes in older adults. *Neuroimage*. 2014;90: 84–92.

- 722 96. Uchida Y, Nishita Y, Kato T, Iwata K, Sugiura S, Suzuki H, et al. Smaller Hippocampal  
723 Volume and Degraded Peripheral Hearing Among Japanese Community Dwellers. *Front*  
724 *Aging Neurosci.* 2018;10: 319.
- 725 97. Loughrey DG, Kelly ME, Kelley GA, Brennan S, Lawlor BA. Association of Age-Related  
726 Hearing Loss With Cognitive Function, Cognitive Impairment, and Dementia: A Systematic  
727 Review and Meta-analysis. *JAMA Otolaryngol Head Neck Surg.* 2018;144: 115–126.
- 728 98. Pierce BL, Burgess S. Efficient design for Mendelian randomization studies: subsample and  
729 2-sample instrumental variable estimators. *Am J Epidemiol.* 2013;178: 1177–1184.
- 730 99. Hemani G, Bowden J, Davey Smith G. Evaluating the potential role of pleiotropy in  
731 Mendelian randomization studies. *Hum Mol Genet.* 2018;27: R195–R208.
- 732  
733  
734
